# Supplementary material
Source: publisher figshare collection journal article supplement (https://frontiersin.figshare.com/ndownloader/files/27631566)
Supplement: Supplementary file 3 [file 27631566]

| HPO code                      | Phenotype                                      | Counts in NMDs | Counts in non-NMDs | P-value      |
|-------------------------------|------------------------------------------------|----------------|--------------------|--------------|
| <i>From OMIM database</i>     |                                                |                |                    |              |
| HP:0003236                    | <b>Elevated serum creatine kinase</b>          | 124            | 59                 | 1.841099e-96 |
| HP:0001284                    | Areflexia                                      | 110            | 58                 | 2.162695e-82 |
| HP:0001265                    | Hyporeflexia                                   | 117            | 100                | 4.686633e-74 |
| HP:0002460                    | Distal muscle weakness                         | 81             | 18                 | 3.014901e-73 |
| HP:0003701                    | Proximal muscle weakness                       | 73             | 20                 | 2.369912e-63 |
| HP:0002936                    | Distal sensory impairment                      | 74             | 29                 | 2.761166e-59 |
| HP:0003560                    | Muscular dystrophy                             | 60             | 7                  | 5.018812e-59 |
| HP:0003693                    | Distal amyotrophy                              | 72             | 27                 | 2.756548e-58 |
| HP:0003677                    | Slow progression                               | 90             | 85                 | 8.981719e-54 |
| HP:0010628                    | Facial palsy                                   | 63             | 34                 | 4.818952e-46 |
| <i>From Orphanet database</i> |                                                |                |                    |              |
| HP:0003236                    | <b>Elevated serum creatine kinase</b>          | 40             | 23                 | 3.047233e-35 |
| HP:0003551                    | Difficulty climbing stairs                     | 20             | 5                  | 7.287806e-21 |
| HP:0003457                    | EMG abnormality                                | 25             | 17                 | 7.380621e-21 |
| HP:0003458                    | EMG: myopathic abnormalities                   | 25             | 18                 | 1.676727e-20 |
| HP:0008981                    | Calf muscle hypertrophy                        | 17             | 5                  | 2.290024e-17 |
| HP:0002515                    | Waddling gait                                  | 19             | 13                 | 5.854754e-16 |
| HP:0003557                    | Increased variability in muscle fiber diameter | 17             | 9                  | 2.199215e-15 |
| HP:0003198                    | Myopathy                                       | 36             | 24                 | 7.730904e-15 |
| HP:0003805                    | Rimmed vacuoles                                | 13             | 2                  | 1.117866e-14 |
| HP:0003391                    | Gowers sign                                    | 13             | 2                  | 1.117866e-14 |

547
