# Supplementary material
Source: publisher figshare collection journal article supplement (https://frontiersin.figshare.com/ndownloader/files/27631566)

# GO

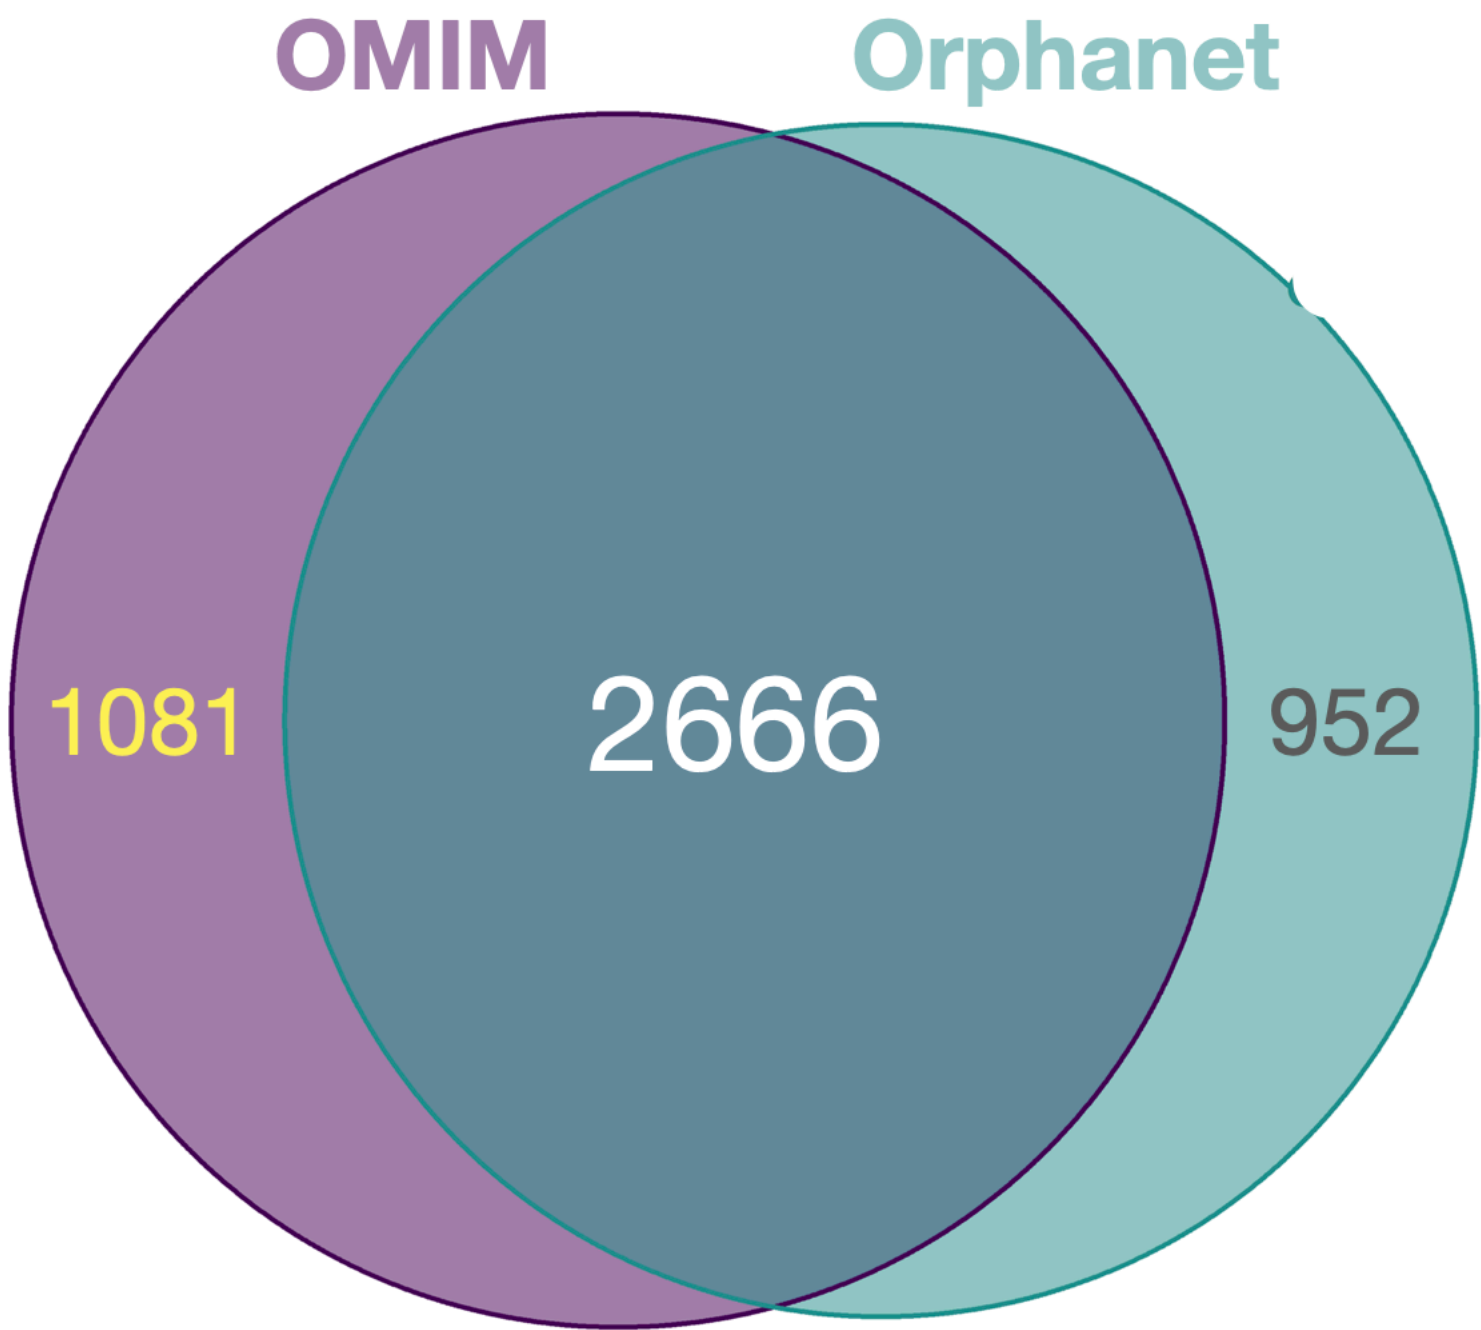

# KEGG

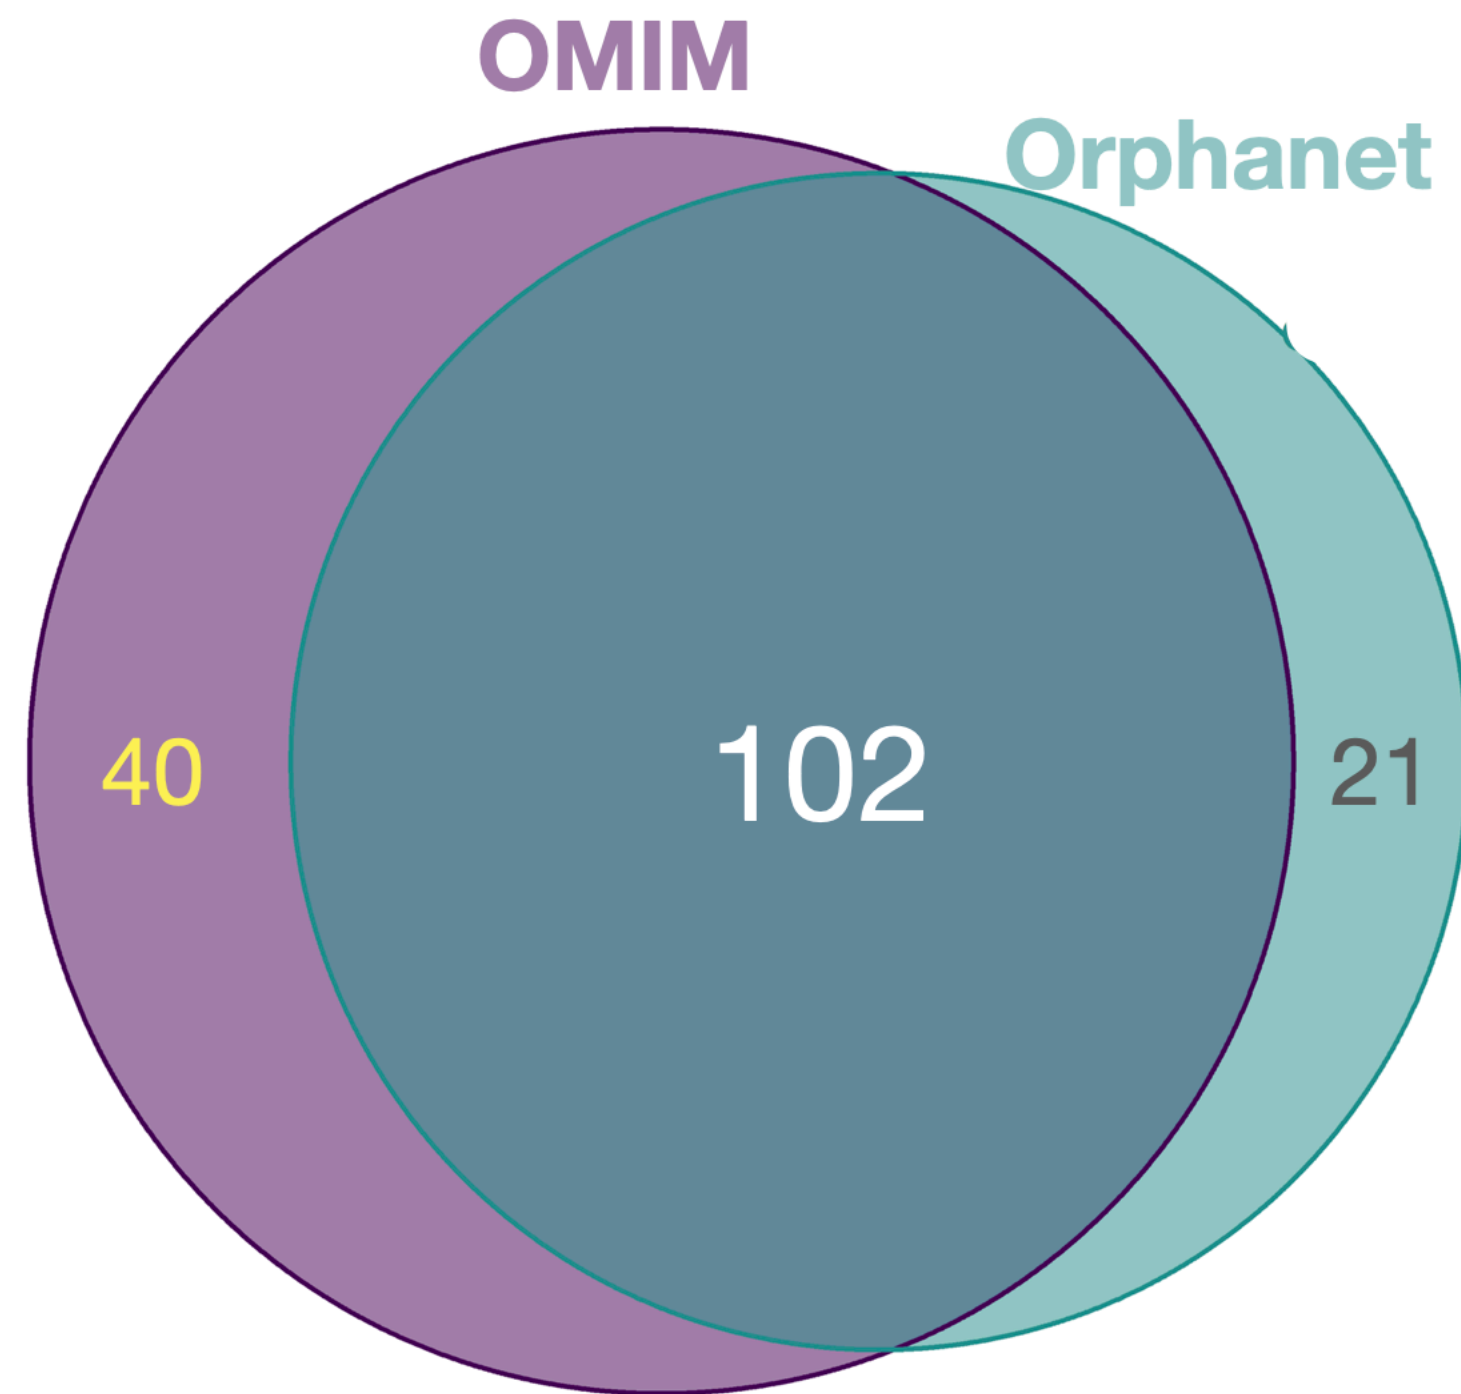

# Reactome

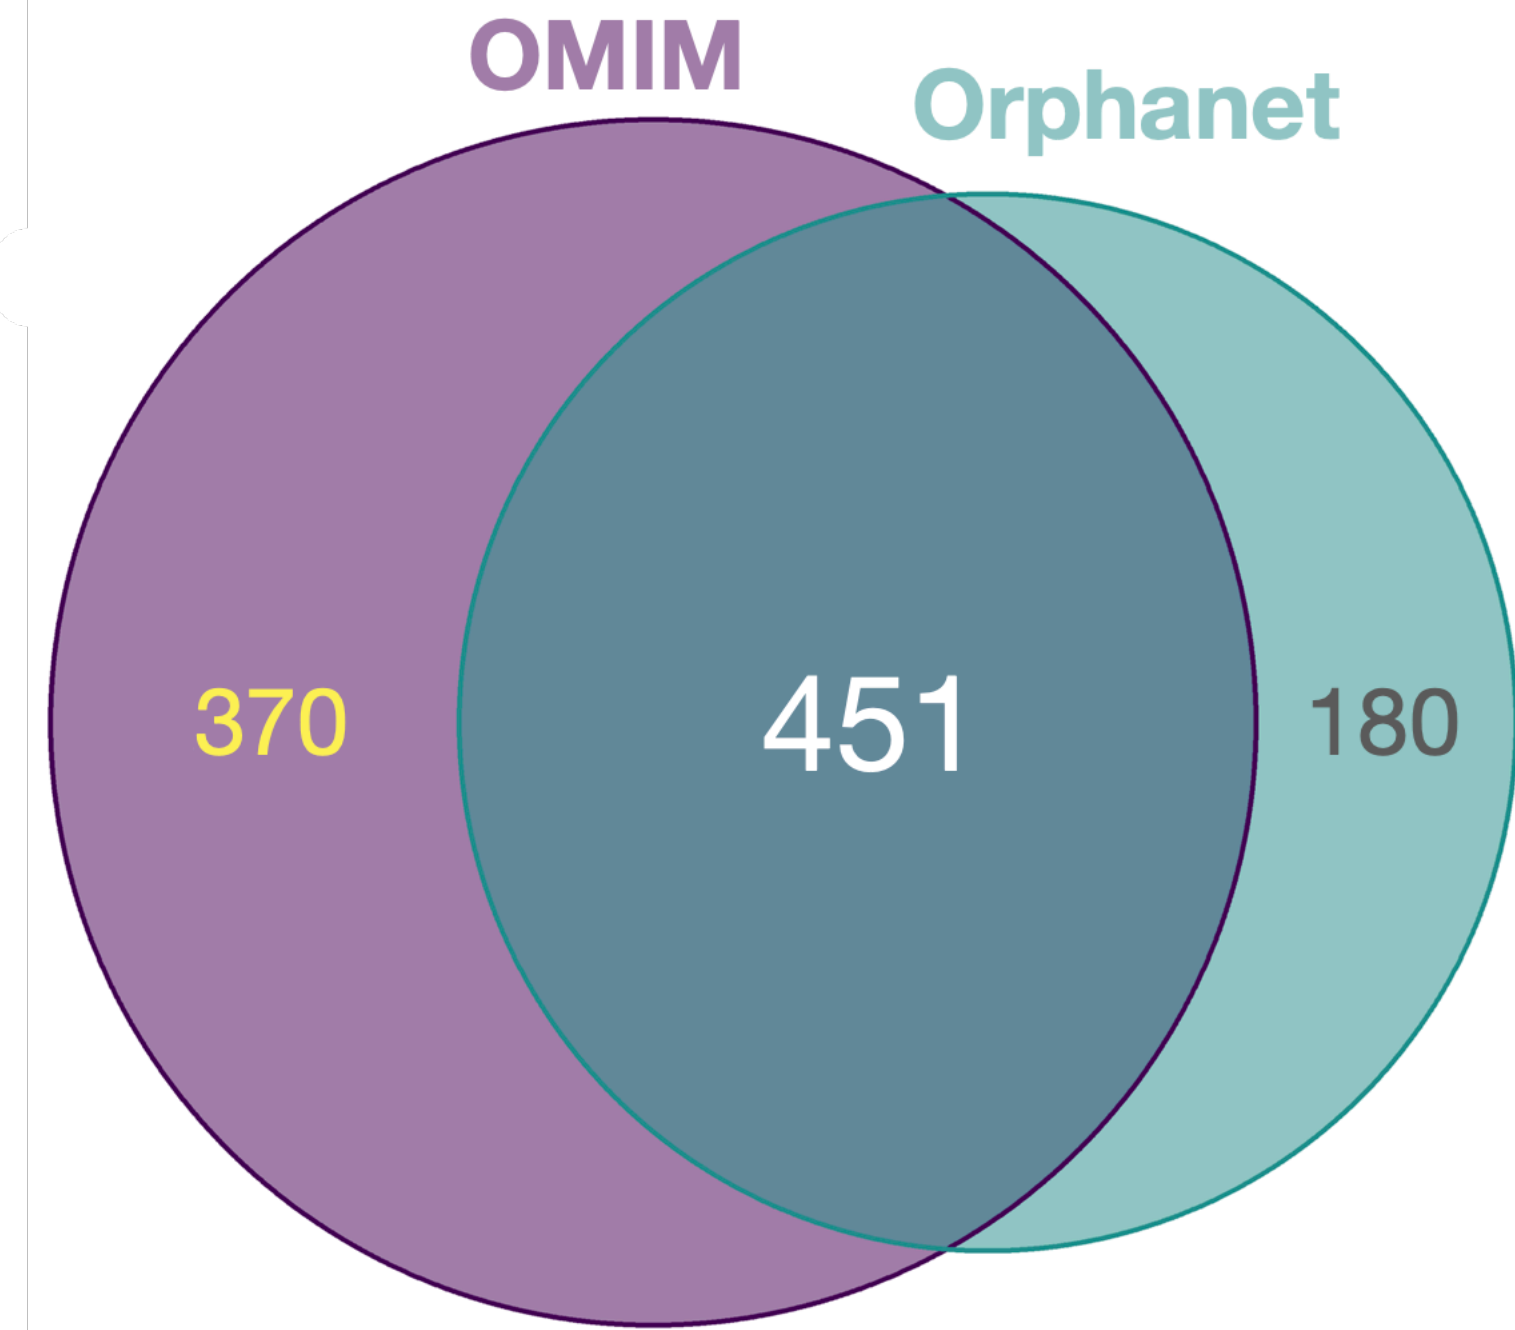

Supplement: Supplementary file 6 [file 27631566]
